# Supplementary material for: Predicting the right mechanism for hypervalent iodine reagents by applying two types of hypervalent twist models: apical twist and equatorial twist
Source: Royal Society of Chemistry journal article supplement (doi:10.1039/d0cp06692c), 2021-01-01
Supplement: d0cp06692c1.pdf [file d0cp06692c1.pdf]

## Predicting the Right Mechanism for Hypervalent Iodine Reagents

### by Applying Two Types of Hypervalent Twist Models:

#### Apical Twist and Equatorial Twist

Tian-Yu Sun,<sup>a,c</sup> Kai Chen,<sup>b,c\*</sup> Qihui Lin,<sup>e\*</sup> Tingting You,<sup>a\*</sup> Penggang Yin<sup>a</sup>

<sup>a</sup> Key Laboratory of Bio-Inspired Smart Interfacial Science and Technology of Ministry of Education, School of Chemistry, Beihang University, Beijing 100191, China

<sup>b</sup> Shenzhen Bay Laboratory, Shenzhen 518132, China

<sup>c</sup> School of Chemistry and Chemical Engineering, Central South University, Changsha 410083, P. R. China

<sup>d</sup> Lab of Computational Chemistry and Drug Design, State Key Laboratory of Chemical Oncogenomics, Peking University Shenzhen Graduate School, Shenzhen, 518055, China

<sup>e</sup> Hygien Sect Longhua Ctr Dis Control & Prevent, Joint Lab Infect Dis Prevent & Control, Shenzhen 518109, Guangdong, Peoples R China.

E-mail: [youtt@buaa.edu.cn](mailto:youtt@buaa.edu.cn)

[kaichen@csu.edu.cn](mailto:kaichen@csu.edu.cn)

[Linqihui2007@163.com](mailto:Linqihui2007@163.com)

#### Computational details

All density functional theory (DFT) calculations were conducted with the Gaussian 16 program.<sup>[1]</sup> The relative free energies (at 298.15K) are in kcal/mol. Keyword `int=grid=99770` was used for all M06-2X tasks to eliminate the unexpected small imaginary frequency. Solvent effects were evaluated with the SMD solvation model (Acetonitrile).<sup>[2]</sup> Intrinsic reaction coordinates (IRC) calculations were performed for the saddle points to confirm that each saddle-point structure indeed connects to two relevant minima on the potential surface (keyword `LQA` was used).<sup>[3]</sup> NBO6 was used to do the analysis.<sup>[4]</sup>

## IRC calculations

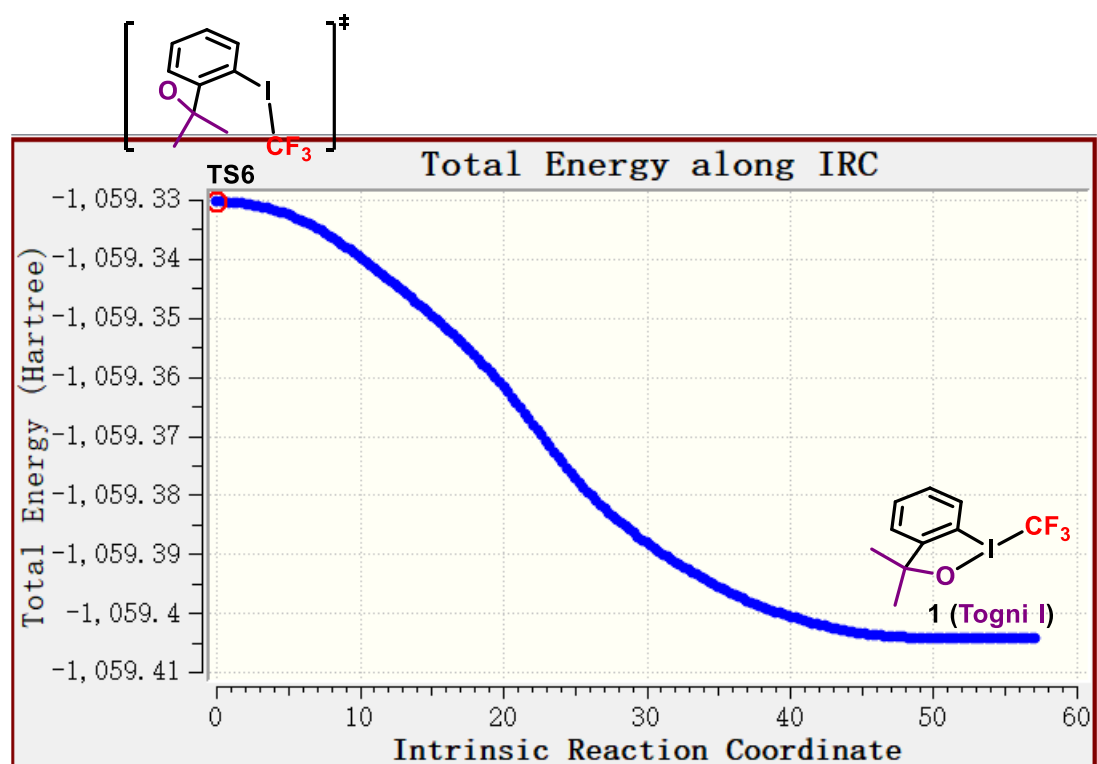

Figure S1. IRC calculations from TS6 to intermediate 1(Togni I).

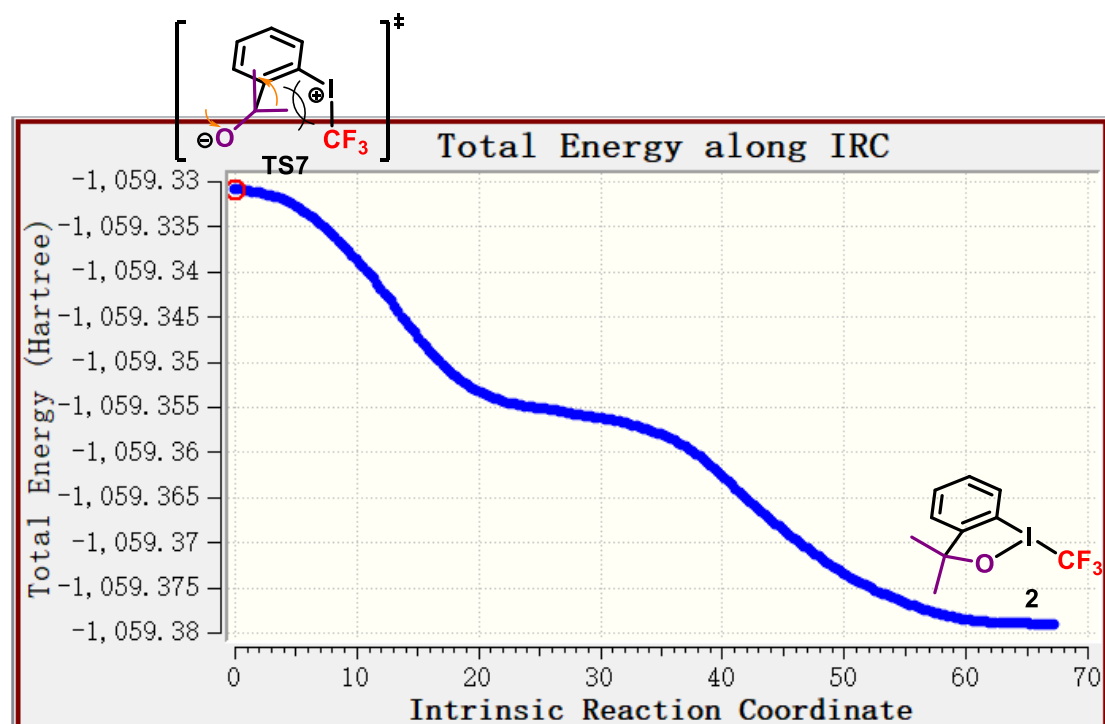

Figure S2. IRC calculations from TS7 to intermediate 2.

## Reference:

- [1] Gaussian 16, Revision A.03, M. J. Frisch, G. W. Trucks, H. B. Schlegel, G. E. Scuseria, M. A. Robb, J. R. Cheeseman, G. Scalmani, V. Barone, G. A. Petersson, H. Nakatsuji, X. Li, M. Caricato, A. V. Marenich, J. Bloino, B. G. Janesko, R. Gomperts, B. Mennucci, H. P. Hratchian, J. V. Ortiz, A. F. Izmaylov, J. L. Sonnenberg, D. Williams-Young, F. Ding, F. Lipparini, F. Egidi, J. Goings, B. Peng, A. Petrone, T. Henderson, D. Ranasinghe, V. G. Zakrzewski, J. Gao, N. Rega, G. Zheng, W. Liang, M. Hada, M. Ehara, K. Toyota, R. Fukuda, J. Hasegawa, M. Ishida, T. Nakajima, Y. Honda, O. Kitao, H. Nakai, T. Vreven, K. Throssell, J. A. Montgomery, Jr., J. E. Peralta, F. Ogliaro, M. J. Bearpark, J. J. Heyd, E. N. Brothers, K. N. Kudin, V. N. Staroverov, T. A. Keith, R. Kobayashi, J. Normand, K. Raghavachari, A. P. Rendell, J. C. Burant, S. S. Iyengar, J. Tomasi, M. Cossi, J. M. Millam, M. Klene, C. Adamo, R. Cammi, J. W. Ochterski, R. L. Martin, K. Morokuma, O. Farkas, J. B. Foresman, and D. J. Fox, Gaussian, Inc., Wallingford CT, 2016.
- [2] Marenich, A. V.; Cramer, C. J.; Truhlar, D. G. *J. Phys. Chem. B* 2009, 113, 6378.
- [3] (a) Fukui, K. *J. Phys. Chem.* 1970, 74, 4161. (b) Fukui, K. *Acc. Chem. Res.* 1981, 14, 363.
- [4] (a) Foster, J. P.; Weinhold, F. *J. Am. Chem. Soc.* 1980. 102, 7211-7218. (b) NBO 6.0. E. D. Glendening. J. K.; Badenhoop, A. E.; Reed, J. E.; Carpenter, J. A.; Bohmann, C. M.; Morales, C. R.; Landis; Weinhold, F. *Theoretical Chemistry Institute, University of Wisconsin, Madison*, 2013.

## Cartesian Coordinates

### 1

|   |             |             |             |
|---|-------------|-------------|-------------|
| C | -0.01927500 | 2.09846300  | -0.20852600 |
| C | -0.49813700 | 0.80389600  | -0.12096900 |
| C | -1.83608500 | 0.49272500  | 0.02215700  |
| C | -2.73529600 | 1.55275600  | 0.11104600  |
| C | -2.28953800 | 2.86457700  | 0.03397900  |
| C | -0.93796800 | 3.13794000  | -0.13313400 |
| H | 1.02803900  | 2.32178800  | -0.34584500 |
| H | -3.79116700 | 1.34949600  | 0.24031100  |
| H | -3.00097000 | 3.67808200  | 0.09788900  |
| H | -0.58987300 | 4.15983300  | -0.20934800 |
| C | -2.23951200 | -0.98155400 | 0.10439800  |
| C | -3.51690500 | -1.24896800 | -0.68501700 |
| H | -3.72060200 | -2.32066000 | -0.66552000 |
| H | -4.37443900 | -0.73031900 | -0.25487900 |
| H | -3.39432900 | -0.93454000 | -1.72249200 |
| C | -2.43162900 | -1.35563100 | 1.57754400  |
| H | -2.69919000 | -2.41157500 | 1.64843700  |
| H | -1.50604100 | -1.19169200 | 2.13448200  |
| H | -3.22215400 | -0.75854500 | 2.03595100  |
| O | -1.21010100 | -1.74176500 | -0.46701200 |
| I | 0.70549800  | -0.93050200 | -0.18285100 |
| C | 2.56284000  | 0.30352800  | 0.13748500  |
| F | 2.94628600  | 1.07455100  | -0.89535800 |
| F | 3.56226400  | -0.57695500 | 0.33742300  |
| F | 2.53860900  | 1.10060900  | 1.21837800  |

### TS1

|   |            |             |             |
|---|------------|-------------|-------------|
| C | 1.54195000 | -2.11808400 | -0.01269000 |
| C | 1.29656000 | -0.76180200 | -0.04135000 |
| C | 2.27450000 | 0.21718600  | 0.01825400  |
| C | 3.59419100 | -0.20913400 | 0.11004700  |
| C | 3.88495200 | -1.56771400 | 0.13726500  |
| C | 2.87104700 | -2.51634100 | 0.07672000  |
| H | 0.73837800 | -2.83985300 | -0.06433400 |
| H | 4.39323800 | 0.52051200  | 0.16252600  |
| H | 4.91622800 | -1.88896300 | 0.20466300  |
| H | 3.10993400 | -3.57162900 | 0.09412600  |
| C | 1.82922400 | 1.66789900  | 0.04018000  |
| C | 2.69039900 | 2.56935500  | -0.82395700 |
| H | 2.26104000 | 3.57119500  | -0.84342600 |
| H | 3.69296700 | 2.63405100  | -0.40054000 |
| H | 2.75484500 | 2.18246400  | -1.84050700 |

|   |             |             |             |
|---|-------------|-------------|-------------|
| C | 1.73304200  | 2.17338500  | 1.47169700  |
| H | 1.36391100  | 3.19938800  | 1.47478100  |
| H | 1.06324400  | 1.54789600  | 2.06553800  |
| H | 2.72141000  | 2.14872500  | 1.93206900  |
| O | 0.51214900  | 1.72085900  | -0.58726800 |
| I | -0.57389200 | 0.17245200  | -0.16795500 |
| C | -3.60323900 | -0.12436600 | 0.02319400  |
| F | -2.89652100 | -1.34838000 | 0.24313100  |
| F | -4.48537800 | -0.52490700 | -0.97556000 |
| F | -4.43701700 | -0.11703200 | 1.13653900  |

## 2

|   |             |             |             |
|---|-------------|-------------|-------------|
| C | -0.06043100 | 2.28767800  | -0.10332800 |
| C | -0.43621500 | 0.95532100  | -0.08515300 |
| C | -1.74674900 | 0.55372900  | 0.00729300  |
| C | -2.74427200 | 1.52124600  | 0.08802400  |
| C | -2.39450800 | 2.86613800  | 0.06188500  |
| C | -1.06031500 | 3.25162600  | -0.03521100 |
| H | 0.98259500  | 2.57598600  | -0.17128400 |
| H | -3.78566600 | 1.23374500  | 0.17270900  |
| H | -3.16832900 | 3.62148500  | 0.11820400  |
| H | -0.79941000 | 4.30234700  | -0.05764600 |
| C | -1.97522400 | -0.95306700 | 0.06989800  |
| C | -3.11484600 | -1.38088100 | -0.84670100 |
| H | -3.21181700 | -2.46713300 | -0.82450500 |
| H | -4.05759000 | -0.94382600 | -0.51545200 |
| H | -2.91684300 | -1.06339800 | -1.87103500 |
| C | -2.23689500 | -1.37086000 | 1.51567600  |
| H | -2.38228500 | -2.45144200 | 1.56486600  |
| H | -1.38583000 | -1.10135700 | 2.14614100  |
| H | -3.12704100 | -0.87480100 | 1.90642800  |
| O | -0.81164300 | -1.60408900 | -0.40502900 |
| I | 0.97412200  | -0.66538000 | -0.08693900 |
| C | 1.38977000  | -2.89600100 | -0.15460100 |
| F | 1.08313800  | -3.51982900 | -1.30065000 |
| F | 0.81570500  | -3.59709400 | 0.83353300  |
| F | 2.72368400  | -3.02813600 | 0.00649600  |

## TS2

|   |            |             |             |
|---|------------|-------------|-------------|
| C | 1.52939500 | -2.07553300 | 0.43155700  |
| C | 0.92269300 | -0.90103300 | 0.00417500  |
| C | 1.56310500 | 0.32559900  | -0.03789800 |
| C | 2.89801400 | 0.32631200  | 0.38239000  |
| C | 3.53890600 | -0.82895500 | 0.80094300  |

|   |             |             |             |
|---|-------------|-------------|-------------|
| C | 2.85661400  | -2.03859800 | 0.82582300  |
| H | 0.96956400  | -3.00122800 | 0.46075100  |
| H | 3.45141700  | 1.25647100  | 0.36778600  |
| H | 4.57551100  | -0.78373300 | 1.11039400  |
| H | 3.34530900  | -2.94534200 | 1.15768900  |
| C | 0.90457500  | 1.62194700  | -0.55941300 |
| C | 1.43410200  | 1.84204400  | -1.99037400 |
| H | 1.00216400  | 2.76188400  | -2.38953900 |
| H | 2.52308800  | 1.92570200  | -2.00483600 |
| H | 1.13319900  | 1.00879200  | -2.62820400 |
| C | 1.31893800  | 2.82499000  | 0.30588800  |
| H | 0.72451500  | 3.68082500  | -0.01812700 |
| H | 1.12331600  | 2.64735000  | 1.36336600  |
| H | 2.37212300  | 3.08234300  | 0.18783600  |
| O | -0.46153600 | 1.49707700  | -0.64058000 |
| I | -1.10031600 | -1.11163800 | -0.55134500 |
| C | -1.66307800 | 0.76633400  | 0.85182600  |
| F | -2.51228700 | 1.64710600  | 0.38775500  |
| F | -0.79487200 | 1.23037700  | 1.72633500  |
| F | -2.45778600 | -0.04172300 | 1.63436900  |

### 3

|   |             |             |             |
|---|-------------|-------------|-------------|
| C | 2.89498500  | -0.07293800 | -0.33128500 |
| C | 1.53089400  | 0.02085700  | -0.07231800 |
| C | 0.89968400  | 1.26791700  | 0.04472800  |
| C | 1.71057800  | 2.39641800  | -0.10198800 |
| C | 3.07158700  | 2.30957300  | -0.35097800 |
| C | 3.66985200  | 1.06755900  | -0.46976300 |
| H | 3.35459800  | -1.04762300 | -0.42310600 |
| H | 1.27296800  | 3.37996600  | -0.02268100 |
| H | 3.65430200  | 3.21557100  | -0.45570200 |
| H | 4.72980900  | 0.97577100  | -0.66930800 |
| C | -0.58610400 | 1.46735400  | 0.36891900  |
| C | -1.06622700 | 2.89212300  | 0.12578700  |
| H | -2.13694800 | 2.94673800  | 0.30622200  |
| H | -0.58362700 | 3.57881800  | 0.81909700  |
| H | -0.86036700 | 3.20823500  | -0.89671900 |
| C | -0.87197100 | 1.07653800  | 1.81552000  |
| H | -1.92199500 | 1.23655500  | 2.06309700  |
| H | -0.60212800 | 0.04601100  | 2.03293000  |
| H | -0.27327800 | 1.73314500  | 2.44751000  |
| O | -1.27333800 | 0.61431300  | -0.61366100 |
| I | 0.58350800  | -1.85372800 | 0.11613000  |
| C | -2.50129200 | 0.15094100  | -0.43474700 |

|                        |             |             |             |
|------------------------|-------------|-------------|-------------|
| F                      | -2.62885800 | -0.70883200 | 0.58608000  |
| F                      | -3.42477900 | 1.10477200  | -0.22758000 |
| F                      | -2.85552400 | -0.50432100 | -1.54035400 |
| <b>CF<sub>3</sub>+</b> |             |             |             |
| C                      | 2.89498900  | 0.48636500  | 0.19415800  |
| F                      | 2.81698000  | 1.02400200  | -0.90569700 |
| F                      | 3.46455700  | -0.59398200 | 0.31103100  |
| F                      | 2.40339300  | 1.03001300  | 1.17748400  |
| <b>4</b>               |             |             |             |
| C                      | -2.99877500 | 0.43278400  | 0.23343700  |
| C                      | -3.07869900 | 1.81663000  | 0.15556600  |
| C                      | -1.94329600 | 2.58014700  | -0.09314700 |
| C                      | -0.70188200 | 1.97478900  | -0.25738200 |
| C                      | -0.65091000 | 0.59836600  | -0.15404300 |
| C                      | -1.76801700 | -0.18433300 | 0.07040900  |
| H                      | -3.87798100 | -0.17351300 | 0.40900700  |
| H                      | -4.03582900 | 2.30651700  | 0.27868400  |
| H                      | -2.02051500 | 3.65716800  | -0.16545300 |
| H                      | 0.18017000  | 2.56437900  | -0.46486600 |
| C                      | -1.59318700 | -1.67534600 | 0.08239200  |
| O                      | -2.51185200 | -2.43577700 | 0.27768600  |
| O                      | -0.36275900 | -2.04972300 | -0.16097600 |
| I                      | 1.10548900  | -0.52353900 | -0.32967400 |
| O                      | 1.59406400  | -0.86171900 | 1.34099300  |
| O                      | 2.15142800  | 1.11164000  | -0.47782700 |
| C                      | 2.46532100  | 1.86223500  | 0.69513000  |
| H                      | 3.32321100  | 1.42797900  | 1.20825500  |
| H                      | 2.71081800  | 2.87239800  | 0.36610300  |
| H                      | 1.62661100  | 1.91093200  | 1.39305500  |
| <b>TS3</b>             |             |             |             |
| C                      | -3.29271900 | -1.38439500 | -0.14256800 |
| C                      | -2.26142800 | -2.30126000 | -0.32238700 |
| C                      | -0.94203400 | -1.87105700 | -0.36003300 |
| C                      | -0.71348000 | -0.51491600 | -0.21032900 |
| C                      | -1.71137000 | 0.42251200  | -0.03279300 |
| C                      | -3.02351600 | -0.02995900 | 0.00096600  |
| I                      | 1.26826700  | 0.12838800  | -0.25572700 |
| O                      | 1.83042000  | -1.00269500 | -1.49714000 |
| C                      | -1.34480000 | 1.88914800  | 0.10894700  |
| O                      | -2.22684200 | 2.71501900  | 0.27893200  |
| O                      | 1.70266400  | -1.00395900 | 1.23879500  |

|   |              |              |              |
|---|--------------|--------------|--------------|
| C | 1. 19908500  | -0. 60200700 | 2. 52541400  |
| O | -0. 08649000 | 2. 10649800  | 0. 03095000  |
| H | 1. 57076900  | -1. 34232100 | 3. 23094200  |
| H | 0. 10698400  | -0. 60828800 | 2. 53414600  |
| H | 1. 57176800  | 0. 38500700  | 2. 80406900  |
| H | -0. 12744000 | -2. 56935500 | -0. 50586200 |
| H | -2. 48213900 | -3. 35459400 | -0. 43524300 |
| H | -4. 31731800 | -1. 73248000 | -0. 11642300 |
| H | -3. 82018900 | 0. 68954100  | 0. 13780700  |

## 5

|   |              |              |              |
|---|--------------|--------------|--------------|
| C | -0. 01387500 | 2. 10208300  | -0. 02394100 |
| C | -0. 47459100 | 0. 79964900  | 0. 02098600  |
| C | -1. 81886600 | 0. 47731100  | 0. 03857200  |
| C | -2. 74630900 | 1. 51266900  | 0. 01016800  |
| C | -2. 31949100 | 2. 82948700  | -0. 03725400 |
| C | -0. 96065400 | 3. 11950900  | -0. 05400000 |
| H | 1. 03463700  | 2. 35583100  | -0. 03828900 |
| H | -3. 79845100 | 1. 25936100  | 0. 02405300  |
| H | -3. 04336100 | 3. 63346300  | -0. 06230900 |
| H | -0. 62250300 | 4. 14686500  | -0. 09214300 |
| O | -1. 28003500 | -1. 80308700 | 0. 08196200  |
| I | 0. 78356800  | -0. 89117800 | 0. 05800600  |
| C | 2. 63838400  | 0. 30469600  | 0. 04214400  |
| F | 2. 79433400  | 1. 05275800  | -1. 04966700 |
| F | 3. 64186900  | -0. 57589000 | 0. 07119500  |
| F | 2. 77412700  | 1. 10308100  | 1. 10059700  |
| C | -2. 25640000 | -0. 96487800 | 0. 08183900  |
| O | -3. 44034700 | -1. 25346600 | 0. 11139000  |

## TS4

|   |              |              |              |
|---|--------------|--------------|--------------|
| C | -0. 15456200 | 2. 44120800  | 0. 77905300  |
| C | -0. 41395500 | 1. 08358000  | 0. 65294200  |
| C | -1. 57469700 | 0. 54781400  | 0. 12236700  |
| C | -2. 53228900 | 1. 46472400  | -0. 31224700 |
| C | -2. 30593400 | 2. 82933900  | -0. 21824200 |
| C | -1. 12156200 | 3. 32196000  | 0. 32280700  |
| H | 0. 76925500  | 2. 79596000  | 1. 21559300  |
| H | -3. 46086600 | 1. 09280400  | -0. 72855500 |
| H | -3. 06301000 | 3. 52075300  | -0. 56643600 |
| H | -0. 95132900 | 4. 38779400  | 0. 39710100  |
| O | -2. 43751400 | -1. 46389500 | 0. 96558500  |
| I | 1. 04504300  | -0. 24895300 | 1. 35441200  |
| C | 2. 35642700  | -0. 04878600 | -0. 39201300 |



|   |             |             |             |
|---|-------------|-------------|-------------|
| F | 1.62813700  | 0.08194300  | -1.47345200 |
| F | 3.10104800  | -1.12811600 | -0.47153700 |
| F | 3.12387200  | 1.00912800  | -0.25010800 |
| C | -1.81978500 | -0.96020100 | 0.01295600  |
| O | -1.36037700 | -1.49552300 | -1.00934600 |

**6**

|   |             |             |             |
|---|-------------|-------------|-------------|
| C | -0.62276300 | 2.50599600  | 0.40697600  |
| C | -0.68798400 | 1.13102800  | 0.23170300  |
| C | -1.78411900 | 0.46501800  | -0.29810500 |
| C | -2.86196200 | 1.26528500  | -0.66988100 |
| C | -2.83082300 | 2.64453300  | -0.52339600 |
| C | -1.71422600 | 3.26833500  | 0.01649000  |
| H | 0.25444000  | 2.97153600  | 0.83458400  |
| H | -3.73129600 | 0.76895900  | -1.08041200 |
| H | -3.68371600 | 3.23628700  | -0.83096900 |
| H | -1.68441000 | 4.34325700  | 0.13679800  |
| O | -3.01211500 | -1.51757200 | -0.64768400 |
| I | 0.97897600  | 0.08336900  | 0.95953100  |
| C | 1.86613000  | -0.50264100 | -0.95715800 |
| F | 1.15125400  | -0.01390500 | -1.94019200 |
| F | 1.94738600  | -1.80623400 | -1.04847000 |
| F | 3.08498500  | 0.00554300  | -1.00929000 |
| C | -1.86958800 | -1.05578200 | -0.52606100 |
| O | -0.77490100 | -1.65411100 | -0.58087400 |

**TS5**

|   |             |             |             |
|---|-------------|-------------|-------------|
| C | -0.15649000 | 2.39237700  | 0.91081400  |
| C | -0.45036000 | 1.03859600  | 0.79294000  |
| C | -1.61977900 | 0.59152400  | 0.18815000  |
| C | -2.49967500 | 1.55788900  | -0.30261500 |
| C | -2.21297000 | 2.91115000  | -0.21824200 |
| C | -1.03757800 | 3.33035000  | 0.39230300  |
| H | 0.75199200  | 2.71187700  | 1.40395400  |
| H | -3.42319000 | 1.21956800  | -0.75583500 |
| H | -2.90720200 | 3.63817800  | -0.62051100 |
| H | -0.80441800 | 4.38447400  | 0.47401300  |
| O | -3.17374700 | -1.17647100 | 0.26765900  |
| I | 0.92779000  | -0.30153200 | 1.64715900  |
| C | 1.42472500  | -1.59549300 | -1.34411900 |
| F | 1.01709400  | -2.74562200 | -1.21168900 |
| F | 2.58335300  | -1.33092000 | -0.99678100 |
| F | 0.79774500  | -0.76028000 | -1.99200400 |
| C | -1.99804900 | -0.88038300 | 0.00927600  |

|            |             |             |             |
|------------|-------------|-------------|-------------|
| 0          | -1.09090600 | -1.63603100 | -0.41005500 |
| <b>7</b>   |             |             |             |
| C          | 3.00341300  | -0.07219700 | -0.37347000 |
| C          | 1.64010700  | -0.09734500 | -0.11322700 |
| C          | 0.94434800  | 1.10207500  | 0.03929300  |
| C          | 1.62505000  | 2.31516400  | -0.04822100 |
| C          | 2.98168300  | 2.33767100  | -0.32342600 |
| C          | 3.66632800  | 1.14218700  | -0.49044900 |
| H          | 3.54886400  | -1.00038500 | -0.47640600 |
| H          | 1.07407900  | 3.23744400  | 0.08698200  |
| H          | 3.50063300  | 3.28332500  | -0.40475800 |
| H          | 4.72788400  | 1.14685000  | -0.70255000 |
| O          | -1.23947800 | 0.48422200  | -0.61811700 |
| I          | 0.74004100  | -1.96707400 | 0.17025300  |
| C          | -2.57771200 | 0.31603300  | -0.41699600 |
| F          | -2.83662100 | -0.25988900 | 0.74839600  |
| F          | -3.24210400 | 1.46089200  | -0.47722500 |
| F          | -3.01697400 | -0.47322200 | -1.38200800 |
| C          | -0.51122800 | 1.18668600  | 0.32024700  |
| O          | -1.02465800 | 1.81238300  | 1.19184800  |
| <b>TS6</b> |             |             |             |
| C          | -0.09725500 | 2.36137200  | 0.80991200  |
| C          | -0.40180300 | 1.01312200  | 0.59617800  |
| C          | -1.62794200 | 0.51534400  | 0.16011400  |
| C          | -2.57380200 | 1.53892200  | -0.04958400 |
| C          | -2.31530700 | 2.88333500  | 0.13251500  |
| C          | -1.06451000 | 3.31193100  | 0.56322000  |
| H          | 0.88254800  | 2.65312500  | 1.16227800  |
| H          | -3.56818400 | 1.25587300  | -0.35903300 |
| H          | -3.10084900 | 3.60479900  | -0.05585200 |
| H          | -0.84729900 | 4.36054800  | 0.71653500  |
| O          | -2.80037900 | -1.21192400 | 1.23563400  |
| I          | 1.26523500  | -0.19690600 | 1.09542800  |
| C          | 2.33909700  | 0.09554600  | -0.78762800 |
| F          | 1.51308300  | -0.03528600 | -1.80065600 |
| F          | 3.28623500  | -0.81546500 | -0.85959800 |
| F          | 2.87892400  | 1.29451600  | -0.82344800 |
| C          | -2.17721900 | -0.96621300 | 0.07028300  |
| C          | -3.13845000 | -1.04550600 | -1.14888100 |
| H          | -3.44391600 | -2.08803700 | -1.25411100 |
| H          | -4.04609100 | -0.46579900 | -0.98873700 |
| H          | -2.67477500 | -0.72793300 | -2.08900700 |

|   |             |             |             |
|---|-------------|-------------|-------------|
| C | -1.08112900 | -2.01667800 | -0.23588500 |
| H | -0.38412700 | -1.73116400 | -1.03025800 |
| H | -0.52545500 | -2.26864200 | 0.66342900  |
| H | -1.59120600 | -2.92859000 | -0.55290000 |

**8**

|   |             |             |             |
|---|-------------|-------------|-------------|
| C | -0.02539000 | 2.19861000  | 0.82112300  |
| C | -0.40247900 | 0.91743700  | 0.42477800  |
| C | -1.70832000 | 0.49653400  | 0.19676300  |
| C | -2.66074800 | 1.50476700  | 0.37974100  |
| C | -2.33561200 | 2.79865900  | 0.75302600  |
| C | -1.01249300 | 3.15548200  | 0.97995000  |
| H | 1.01362700  | 2.44365100  | 0.99465900  |
| H | -3.68245100 | 1.18719800  | 0.20850800  |
| H | -3.12080800 | 3.53511500  | 0.87503200  |
| H | -0.74407000 | 4.15984500  | 1.28017100  |
| O | -3.63461100 | -0.87751400 | -0.26199900 |
| I | 1.27065400  | -0.36679500 | 0.19060300  |
| C | 1.86139000  | 0.42859600  | -1.76410600 |
| F | 0.81486400  | 0.96016300  | -2.35214900 |
| F | 2.33338300  | -0.55756500 | -2.49430200 |
| F | 2.79217200  | 1.34575300  | -1.61434400 |
| C | -2.29897100 | -0.91917000 | -0.20185400 |
| C | -1.71297500 | -1.31075000 | -1.58116400 |
| H | -2.15565600 | -2.27102400 | -1.85586500 |
| H | -2.02665100 | -0.57040100 | -2.32088900 |
| H | -0.62707900 | -1.41439800 | -1.63124000 |
| C | -1.84448300 | -1.93151300 | 0.87913300  |
| H | -0.76590700 | -2.06279700 | 0.99266500  |
| H | -2.25971600 | -1.62774300 | 1.84270600  |
| H | -2.27224400 | -2.90184900 | 0.61650000  |

**TS7**

|   |             |             |             |
|---|-------------|-------------|-------------|
| C | 0.05150400  | 2.33563400  | 0.88854100  |
| C | -0.20975800 | 1.04004400  | 0.42925000  |
| C | -1.47123600 | 0.46143200  | 0.30749000  |
| C | -2.50457600 | 1.34904200  | 0.66859800  |
| C | -2.29559400 | 2.63479500  | 1.12719800  |
| C | -1.00644700 | 3.14200100  | 1.24980100  |
| H | 1.06661000  | 2.70174800  | 0.95435700  |
| H | -3.52409400 | 1.00819800  | 0.57106400  |
| H | -3.14769300 | 3.24911300  | 1.39118700  |
| H | -0.82576300 | 4.14643200  | 1.60867300  |
| O | -2.26080000 | -0.64254700 | -1.60816100 |

|   |             |             |             |
|---|-------------|-------------|-------------|
| I | 1.60409800  | 0.07691600  | -0.07800300 |
| C | 1.54397000  | 0.56597200  | -2.21540600 |
| F | 0.67158500  | 1.52498100  | -2.41536400 |
| F | 1.21330800  | -0.49153000 | -2.92075800 |
| F | 2.74325700  | 0.97070700  | -2.57892100 |
| C | -1.92819100 | -0.90901000 | -0.33306600 |
| C | -0.86130700 | -2.02669700 | -0.22909400 |
| H | -1.36764000 | -2.97131500 | -0.43822800 |
| H | -0.09861700 | -1.90885000 | -0.99521100 |
| H | -0.38364200 | -2.11172900 | 0.75254500  |
| C | -3.13005300 | -1.44492700 | 0.49416400  |
| H | -2.90791300 | -1.55945300 | 1.56052100  |
| H | -4.01126100 | -0.81537000 | 0.38249700  |
| H | -3.38822900 | -2.42593500 | 0.09121600  |
